# Supplementary material
Source: PubMed Central journal article supplement (PMC7495452)
Supplement: ao0c02016_si_001.pdf [file ao0c02016_si_001.pdf]

# **Adsorption separation of Cr(VI) from water phase by using multiwalled-carbon-nanotube-immobilized ionic liquids**

Lihan Sun<sup>†</sup>, Mengru Wang<sup>†</sup>, Wei Li, Sha Luo, Yan Wu, Chunhui Ma<sup>\*</sup>, Shouxin Liu<sup>\*\*</sup>

Key Laboratory of Bio-based Material Science and Technology (Ministry of Education),

College of Material Science and Engineering, Northeast Forestry University, 150040 Harbin,

China

<sup>†</sup>Authors contributed equally to this work.

Corresponding authors' address: Key Laboratory of Bio-based Material Science and

Technology (Ministry of Education), College of Material Science and Engineering, Northeast

Forestry University, Harbin 150040, China

\*Tel.: +86-451-82191204, Fax: +86-451-82191204 (C. Ma)

\*\*Tel.: +86-451-82191204, Fax: +86-451-82191502 (S. Liu)

\*E-mail: [mchmchmchmch@163.com](mailto:mchmchmchmch@163.com) (C. Ma)

\*\*E-mail: [liushouxin@126.com](mailto:liushouxin@126.com) (S. Liu)

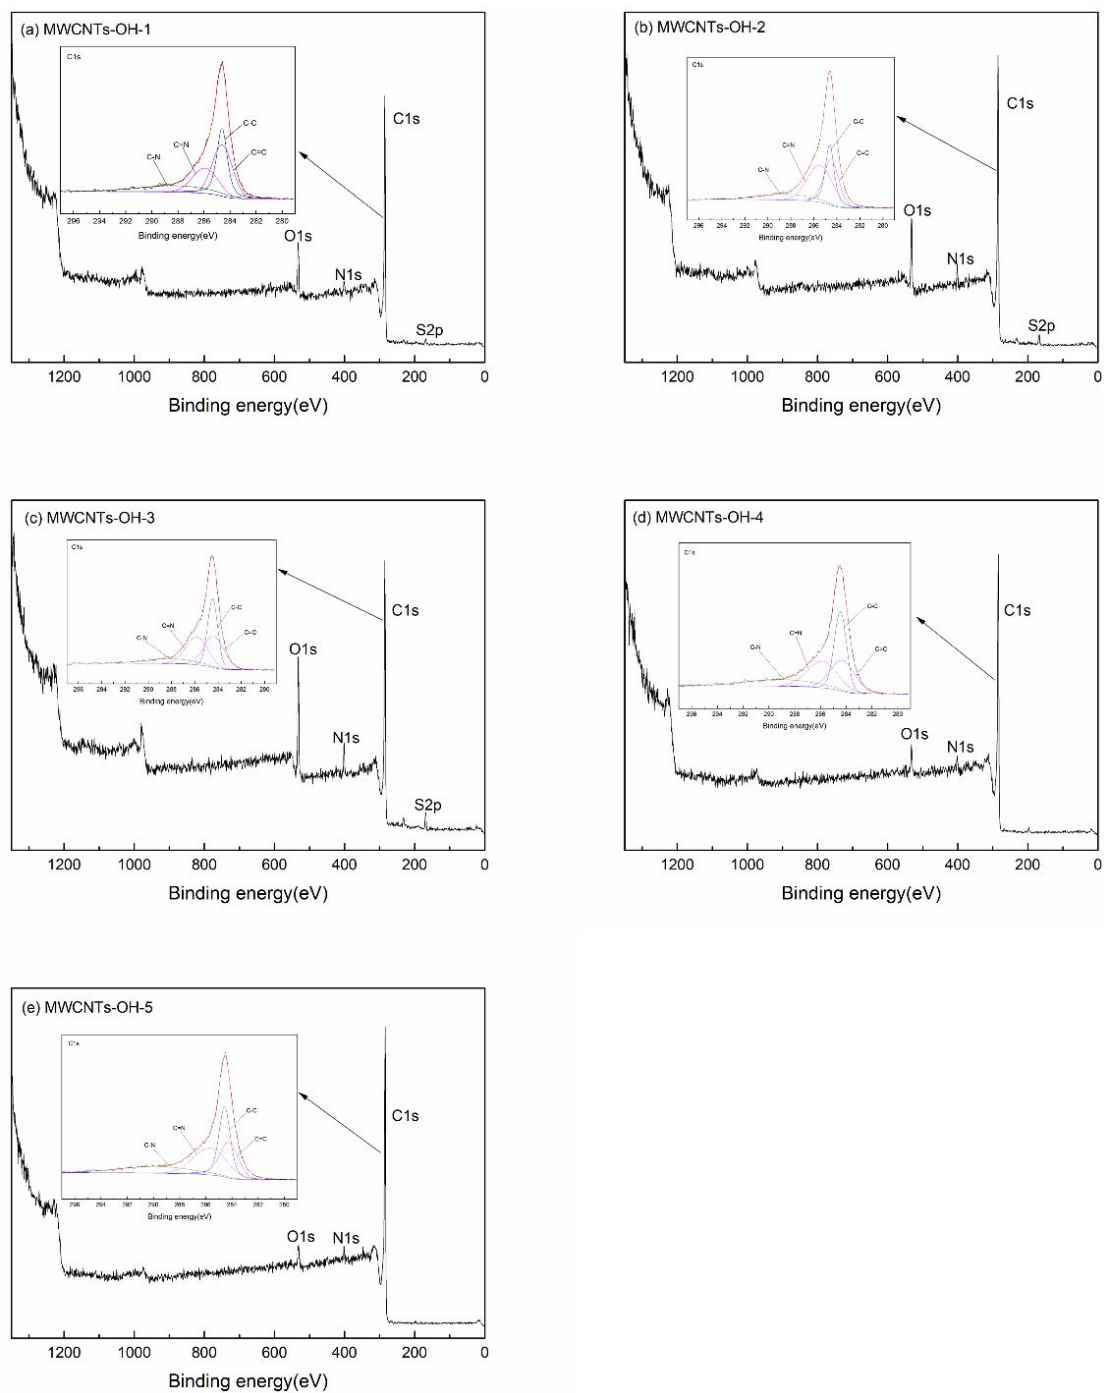

**Figure S1** XPS spectra of MWCNTs-OH-1 immobilized ILs and C1s peak split spectra (a), MWCNTs-OH-2 immobilized ILs and C1s peak split spectra (b), MWCNTs-OH-3 immobilized ILs and C1s peak split spectra (c), MWCNTs-OH-4 immobilized ILs and C1s peak split spectra (d), MWCNTs-OH-5 immobilized ILs and C1s peak split spectra (e)

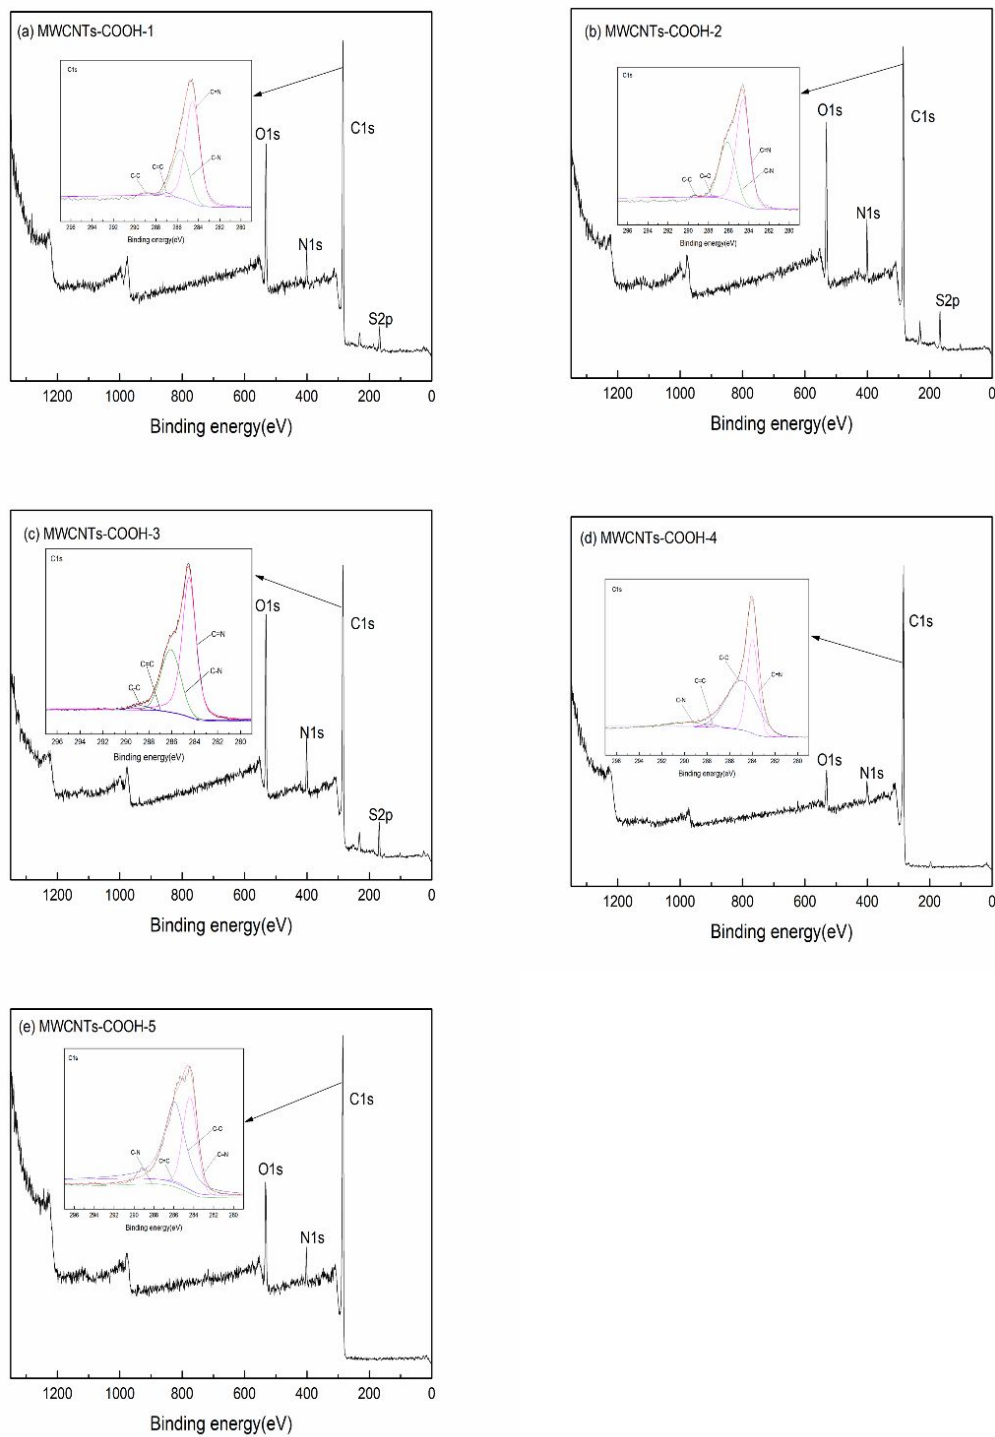

**Figure S2** XPS spectra of MWCNTs-COOH-1 immobilized ILs and C1s peak split spectra (a), MWCNTs-COOH-2 immobilized ILs and C1s peak split spectra (b), MWCNTs-COOH-3

immobilized ILs and C1s peak split spectra (c), MWCNTs-COOH-4 immobilized ILs and C1s

peak split spectra (d), MWCNTs-COOH-5 immobilized ILs and C1s peak split spectra (e)

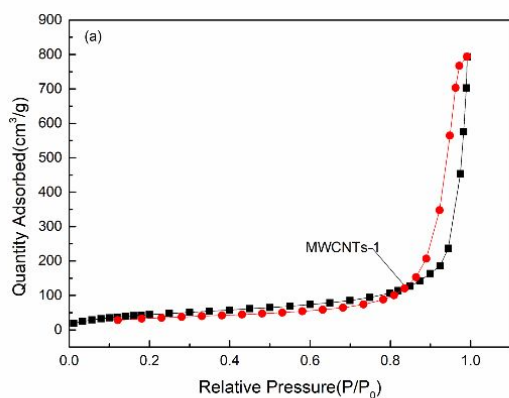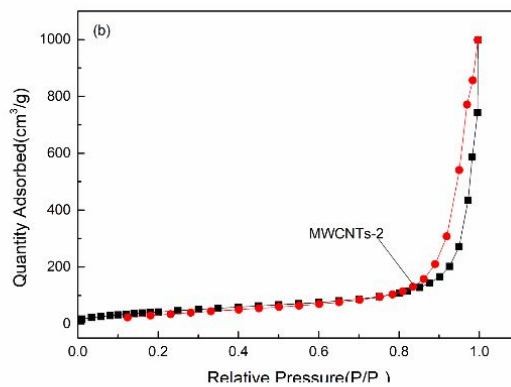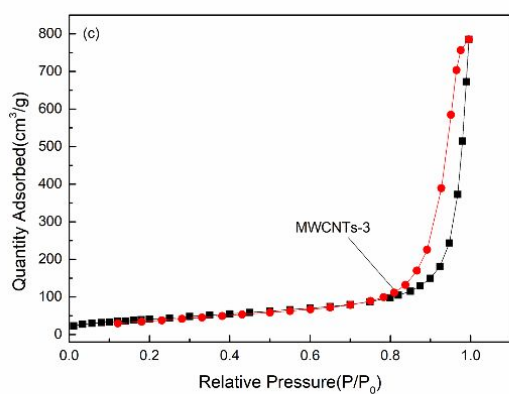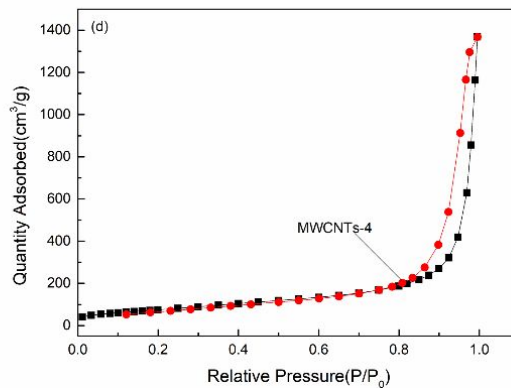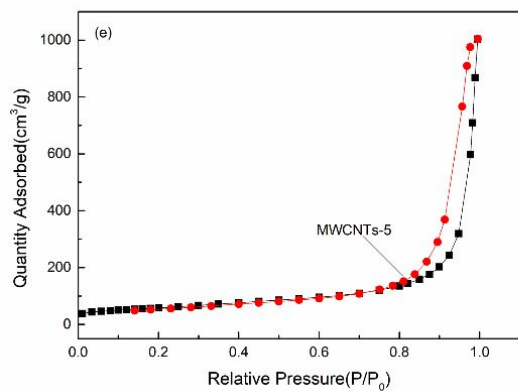

**Figure S3** The N<sub>2</sub> adsorption-desorption isotherms curves of MWCNTs-1 (a), MWCNTs-2 (b), MWCNTs-3 (c), MWCNTs-4 (d), MWCNTs-5 (e)

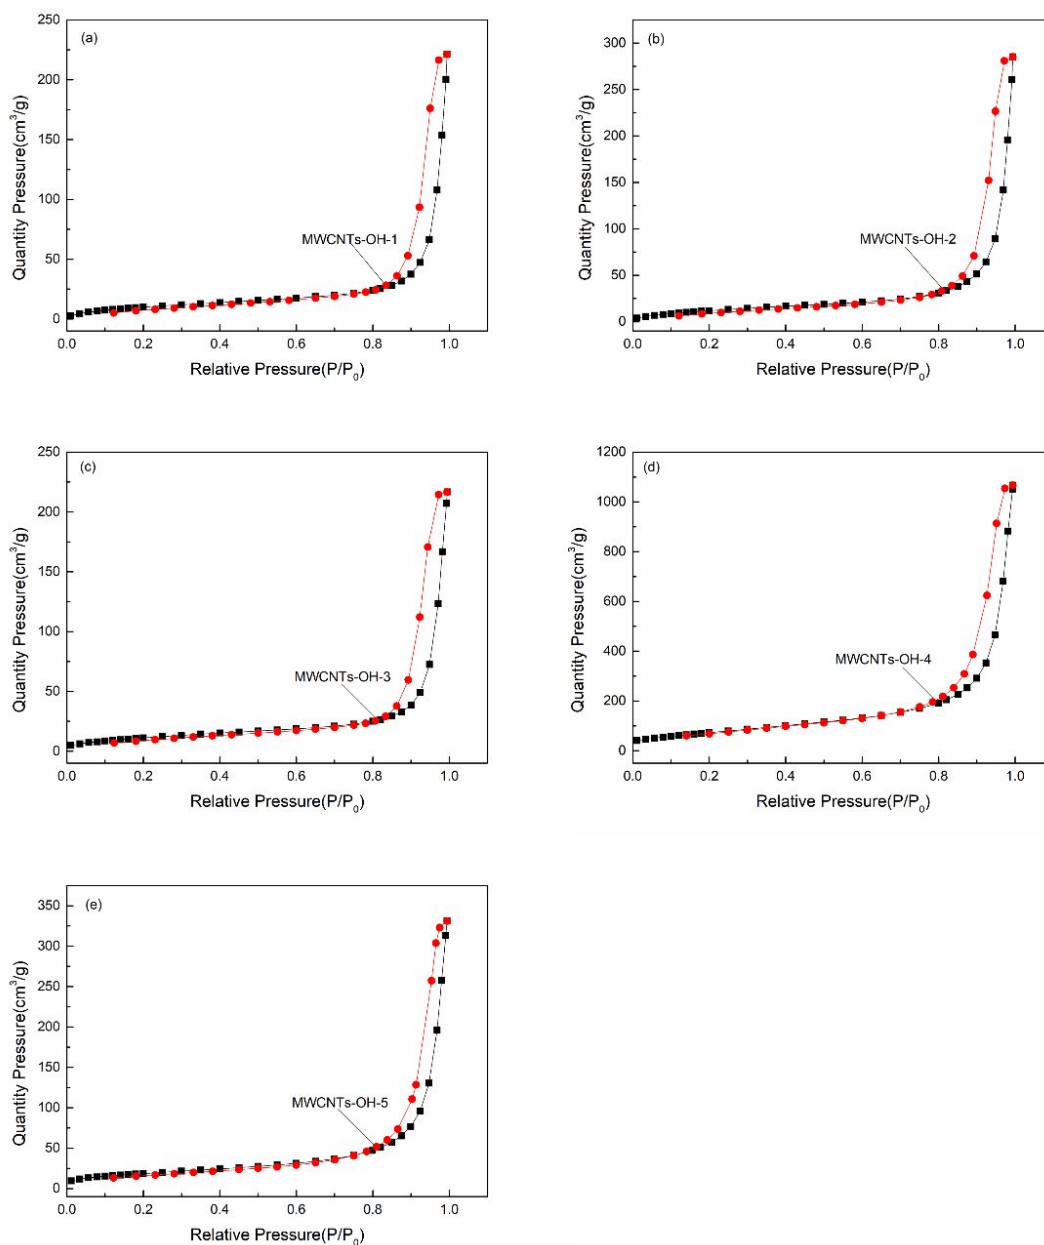

**Figure S4** The  $\text{N}_2$  adsorption-desorption isotherms curves of MWCNTs-OH-1 (a), MWCNTs-OH-2 (b), MWCNTs-OH-3 (c), MWCNTs-OH-4 (d), MWCNTs-OH-5 (e)

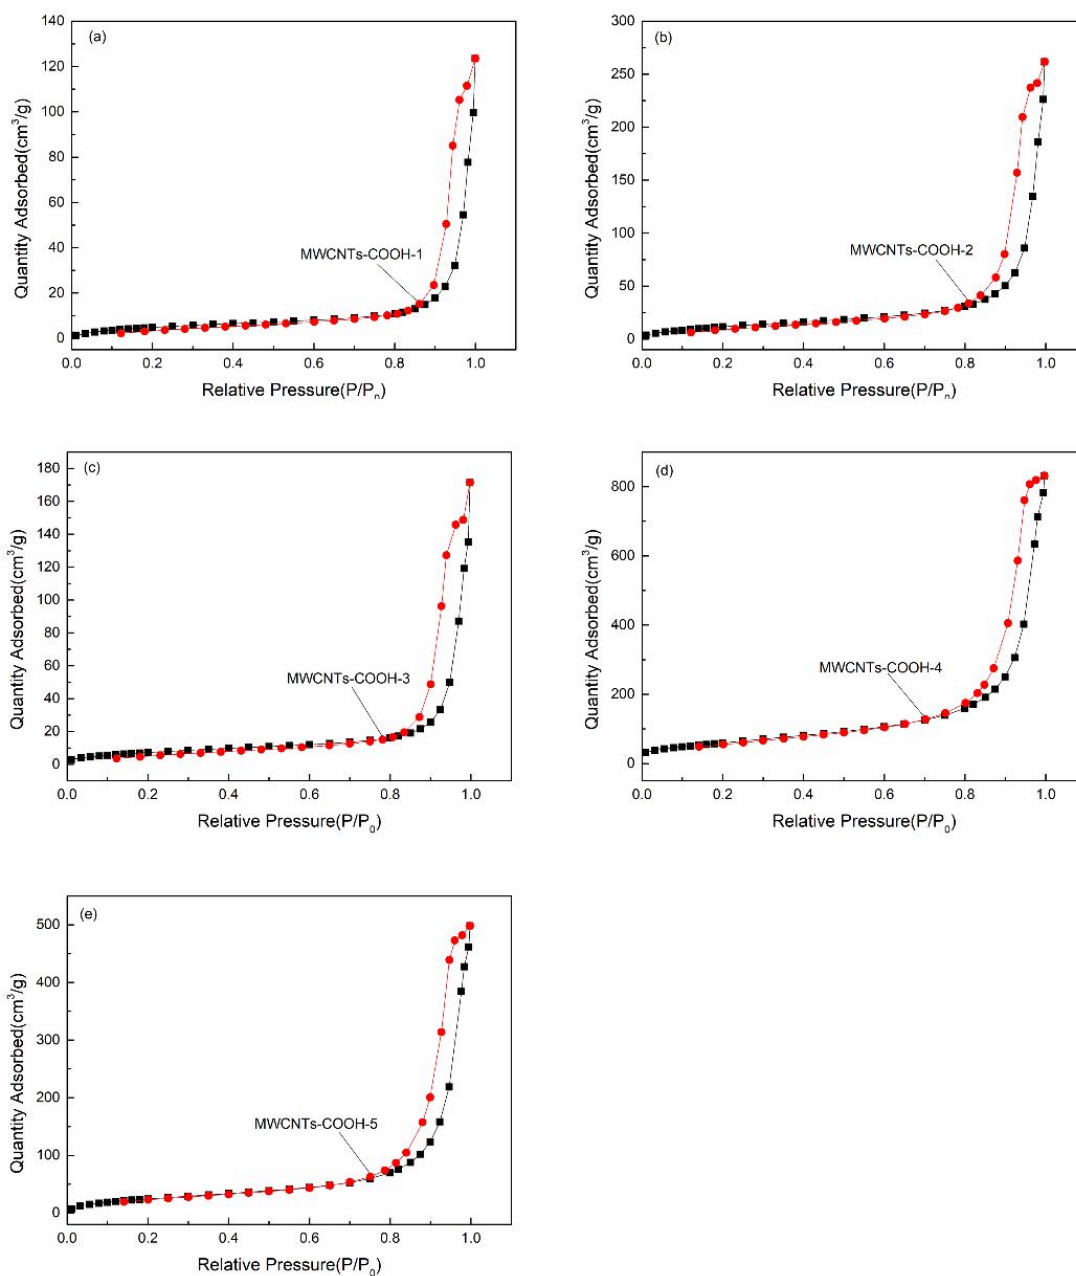

**Figure S5** The  $N_2$  adsorption-desorption isotherms curves of MWCNTs-COOH-1 (a),



MWCNTs-COOH-2 (b), MWCNTs-COOH-3 (c), MWCNTs-COOH-4 (d), MWCNTs-COOH-5

(e)

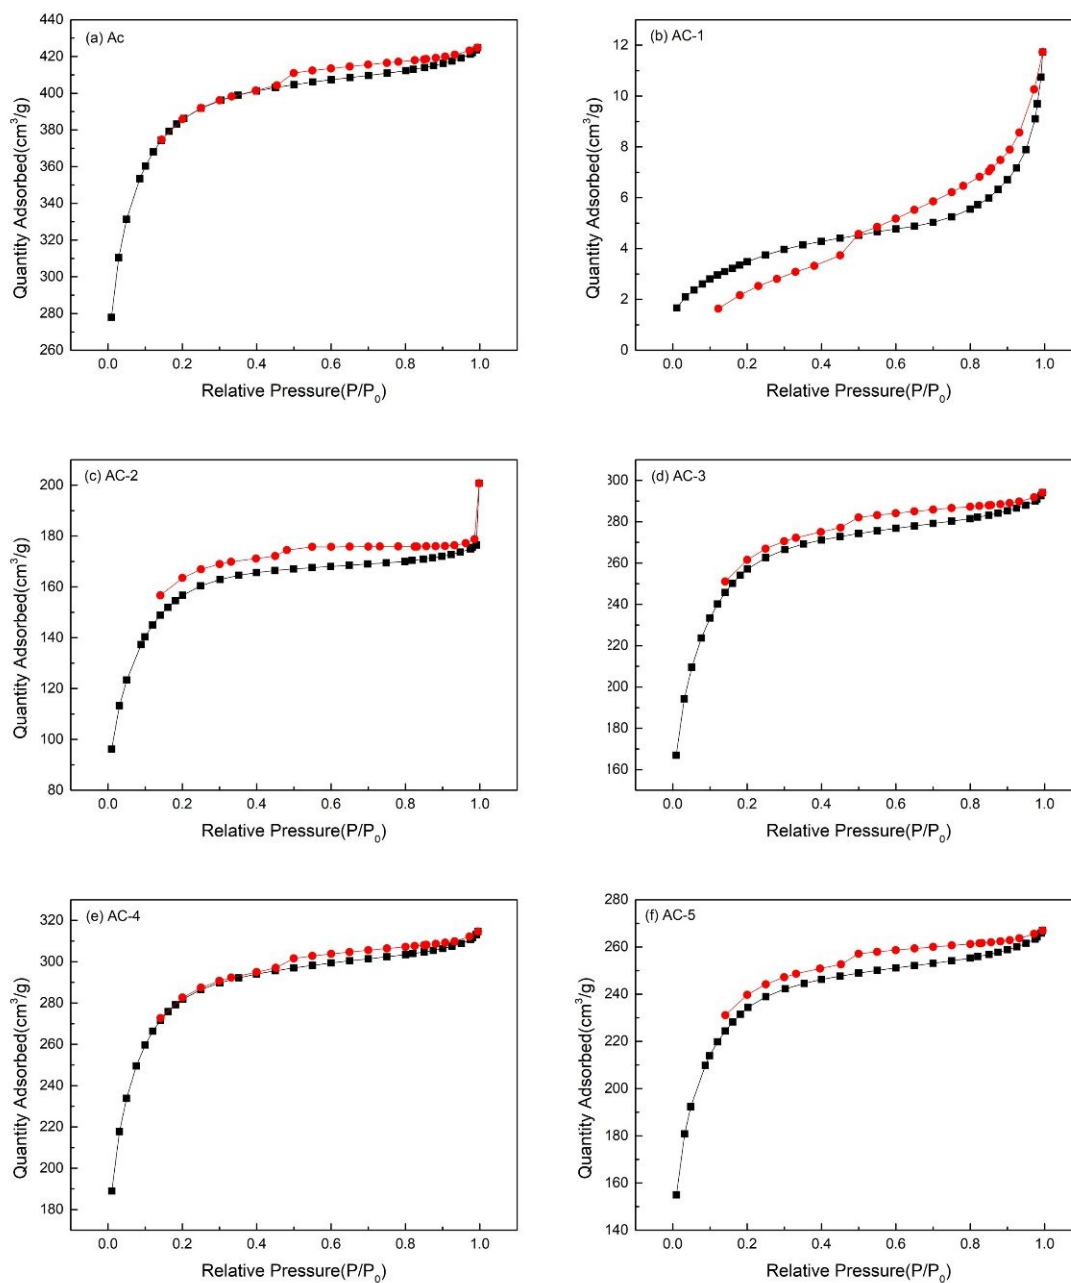

**Figure S6** The N<sub>2</sub> adsorption-desorption isotherms curves of AC (a), AC-1 (b), AC-2 (c), AC-3 (d), AC-4 (e), AC-5 (f)

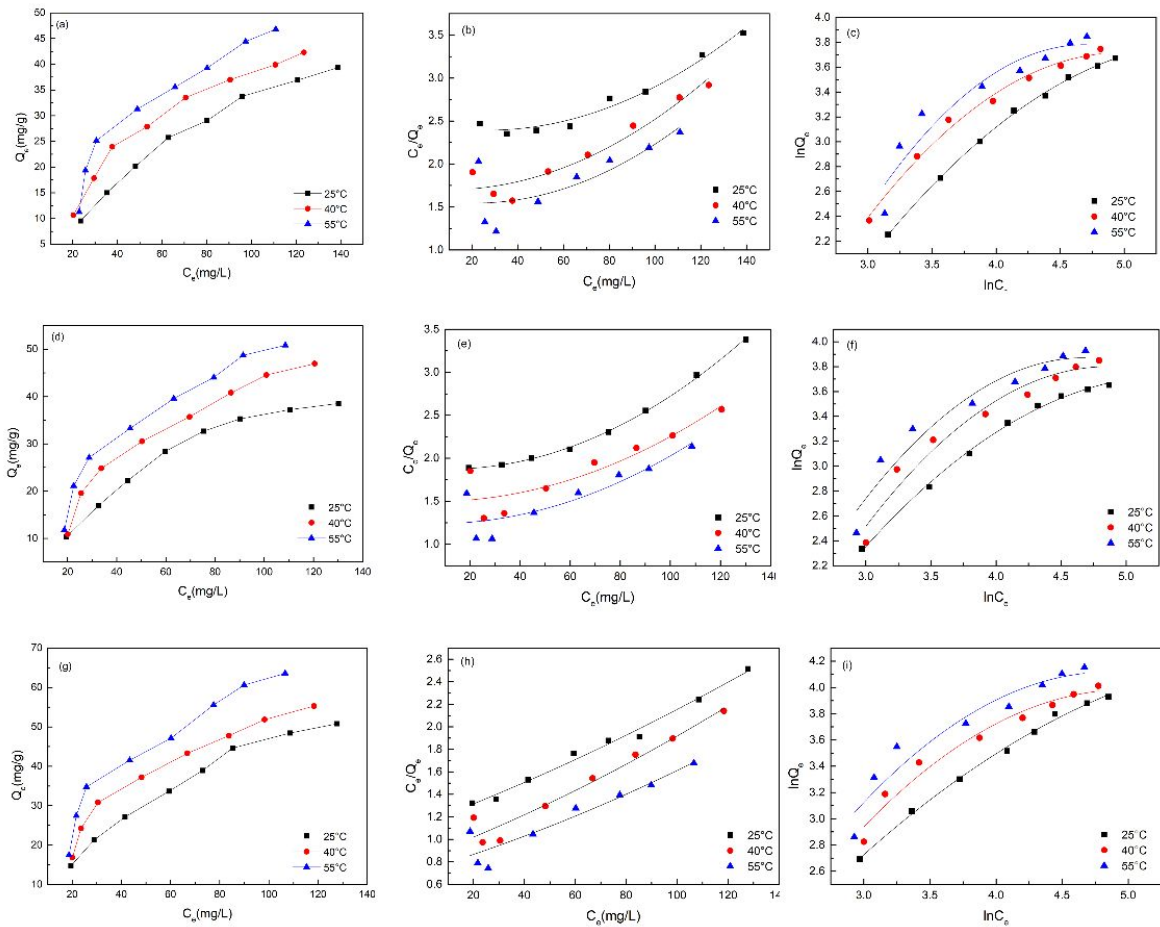

**Figure S7** Adsorption isothermal curves of Cr(VI) on MWCNTs-3 (a), adsorption data of MWCNTs-3 Langmuir model at different temperatures (b), adsorption data of MWCNTs-3 Freundlich model at different temperatures (c), adsorption isothermal curves of Cr(VI) on MWCNTs-OH-3 (d), adsorption data of MWCNTs-OH-3 Langmuir model at different temperatures (e), adsorption data of MWCNTs-OH-3 Freundlich model at different

temperatures (f), adsorption isothermal curves of Cr(VI) on MWCNTs-COOH-3 (g),  
adsorption data of MWCNTs-COOH-3 Langmuir model at different temperatures (h),  
adsorption data of MWCNTs-COOH-3 Freundlich model at different temperatures (i)

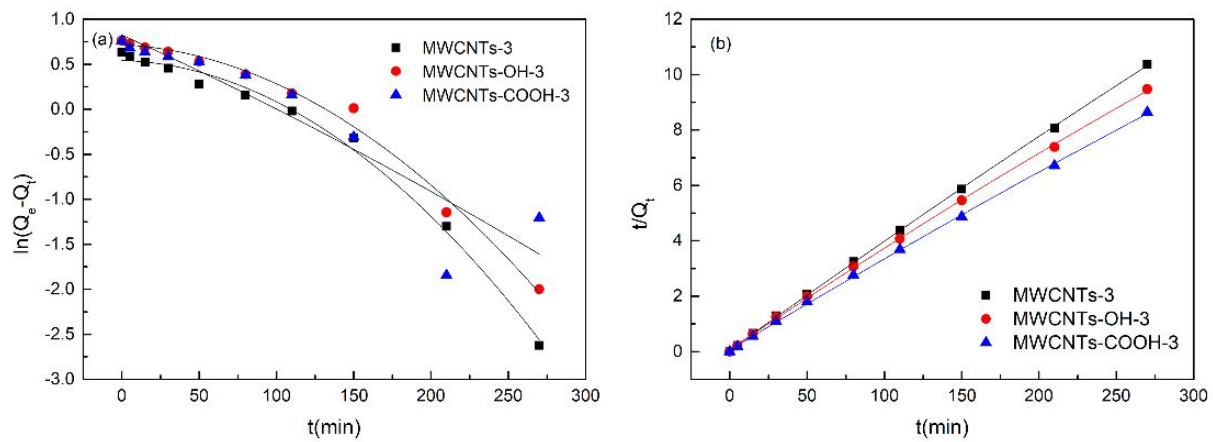

**Figure S8** Pseudo first-order kinetic model for adsorption of Cr(VI) by MWCNTs immobilized

ILs (a), Pseudo second-order kinetic model for adsorption of Cr(VI) by MWCNTs immobilized

ILs (b)
